# Supplementary material for: Structural and functional studies of the Mycobacterium tuberculosis VapBC30 toxin-antitoxin system: implications for the design of novel antimicrobial peptides
Source: PubMed Central journal article supplement — Nucleic Acids Res. 2015 Jul 6;43(15):7624–37. doi: 10.1093/nar/gkv689 (PMC4551927; doi:10.1093/nar/gkv689), 2015-07-06
Supplement: supp_gkv689_Updated_supplementarydata02_gkv689.pdf [file supp_gkv689_Updated_supplementarydata02_gkv689.pdf]

**Supplementary Table S1.** Primers used in this study

| <b>primer</b>              | <b>sequence (5' – 3')</b>                    |
|----------------------------|----------------------------------------------|
| VapB30-f                   | GGAATTCCATATGGCGCTGAGTATCAAGCACC             |
| VapB30-r                   | CCGCTCGAGTCAGGCCGGCAATCC                     |
| VapC30-f                   | GGAATTCCATATGATGGTGATCGACACGTCCGCG           |
| VapC30-r                   | CCGCTCGAGTTAGGGCAGCGCGACCGTGGC               |
| VapBC30-f                  | GGAATTCCATATGGCGCTGAGTATCAAGCAC              |
| VapBC30-r                  | CCGCTCGAGTTAGGGCAGCGCGACCGT                  |
| tRNA <sup>fMET</sup> _T7-f | TAATACGACTCACTATAGGGAGAGGTAGCCTGGCATTACCGACG |
| tRNA <sup>fMET</sup> _T7-r | ACCTCTGGGGTCATTTCCGCTG                       |

## Supplementary Table S2. Statistics for data collection and model refinement

### A. Data collection

| Data set                                        | SAD (Se peak)                       | Crystal form I (SeMet)              | Crystal form II (Native)            |
|-------------------------------------------------|-------------------------------------|-------------------------------------|-------------------------------------|
| X-ray wavelength (Å)                            | 0.9791                              | 0.9791                              | 1.0000                              |
| Space group                                     | P3 <sub>1</sub> 21                  | P3 <sub>1</sub> 21                  | P3 <sub>1</sub> 21                  |
| Unit cell length (Å)                            | a = b = 96.44<br>c = 233.24         | a = b = 96.31<br>c = 233.03         | a = b = 96.38<br>c = 232.79         |
| Unit cell angle (°)                             | $\alpha = \beta = 90, \gamma = 120$ | $\alpha = \beta = 90, \gamma = 120$ | $\alpha = \beta = 90, \gamma = 120$ |
| Resolution range (Å)                            | 50.0–2.85 (2.90–2.85) <sup>a</sup>  | 50.0–2.70 (2.75–2.70) <sup>a</sup>  | 50.0–2.70 (2.75–2.70) <sup>a</sup>  |
| Total /unique reflections                       | 1,093,614 / 31,502                  | 233,858 / 34,963                    | 272,621 / 35,181                    |
| Completeness (%)                                | 99.9 (100) <sup>a</sup>             | 98.9 (99.9) <sup>a</sup>            | 99.3 (99.0) <sup>a</sup>            |
| $\langle I \rangle / \langle \sigma(I) \rangle$ | 83.4 (12.4) <sup>a</sup>            | 37.0 (4.7) <sup>a</sup>             | 41.0 (5.4) <sup>a</sup>             |
| $R_{\text{merge}}^b$                            | 0.173 (0.531) <sup>a</sup>          | 0.087 (0.613) <sup>a</sup>          | 0.088 (0.693) <sup>a</sup>          |
| $CC_{1/2}$                                      |                                     | 0.996 (0.944) <sup>a</sup>          | 0.998 (0.944) <sup>a</sup>          |

### B. Model refinement

|                                                               |                   |                   |
|---------------------------------------------------------------|-------------------|-------------------|
| $R_{\text{work}} / R_{\text{free}}^c$                         | 0.245 / 0.281     | 0.207 / 0.244     |
| No. of nonhydrogen atoms / average B-factor (Å <sup>2</sup> ) |                   |                   |
| Protein                                                       | 4,749 / 60.6      | 4,944 / 61.1      |
| Water oxygen                                                  | 55 / 48.3         | 103 / 48.3        |
| Magnesium ion                                                 | 2 / 44.6          | 3 / 40.1          |
| Wilson B-factor (Å <sup>2</sup> )                             | 57.5              | 54.2              |
| R.m.s. deviations from ideal geometry                         |                   |                   |
| Bond lengths (Å) / bond angles (°)                            | 0.010 / 1.42      | 0.011 / 1.21      |
| R.m.s. Z-scores <sup>d</sup>                                  |                   |                   |
| Bond lengths / bond angles                                    | 0.500 / 0.640     | 0.566 / 0.571     |
| Ramachandran plot (%)                                         |                   |                   |
| Favored                                                       | 92.5 <sup>e</sup> | 94.0 <sup>e</sup> |
| Outliers                                                      | 0.0 <sup>e</sup>  | 0.0 <sup>e</sup>  |
| Rotamer outliers (%)                                          | 2.5 <sup>e</sup>  | 2.4 <sup>e</sup>  |

<sup>a</sup> Values in parentheses refer to the highest resolution shell.

<sup>b</sup>  $R_{\text{merge}} = \sum_h \sum_i |I(h)_i - \langle I(h) \rangle| / \sum_h \sum_i I(h)_i$ , where  $I(h)$  is the intensity of reflection  $h$ ,  $\sum_h$  is the sum over all reflections, and  $\sum_i$  is the sum over  $i$  measurements of reflection  $h$ .

<sup>c</sup>  $R = \sum | |F_{\text{obs}}| - |F_{\text{calc}}| | / \sum |F_{\text{obs}}|$ , where  $R_{\text{free}}$  was calculated from a randomly chosen 5% of reflections, that were not used for structure refinement and  $R_{\text{work}}$  was calculated from the remaining reflections.

<sup>d</sup> Values obtained using REFMAC (39).

<sup>e</sup> Values obtained using MolProbity (41).

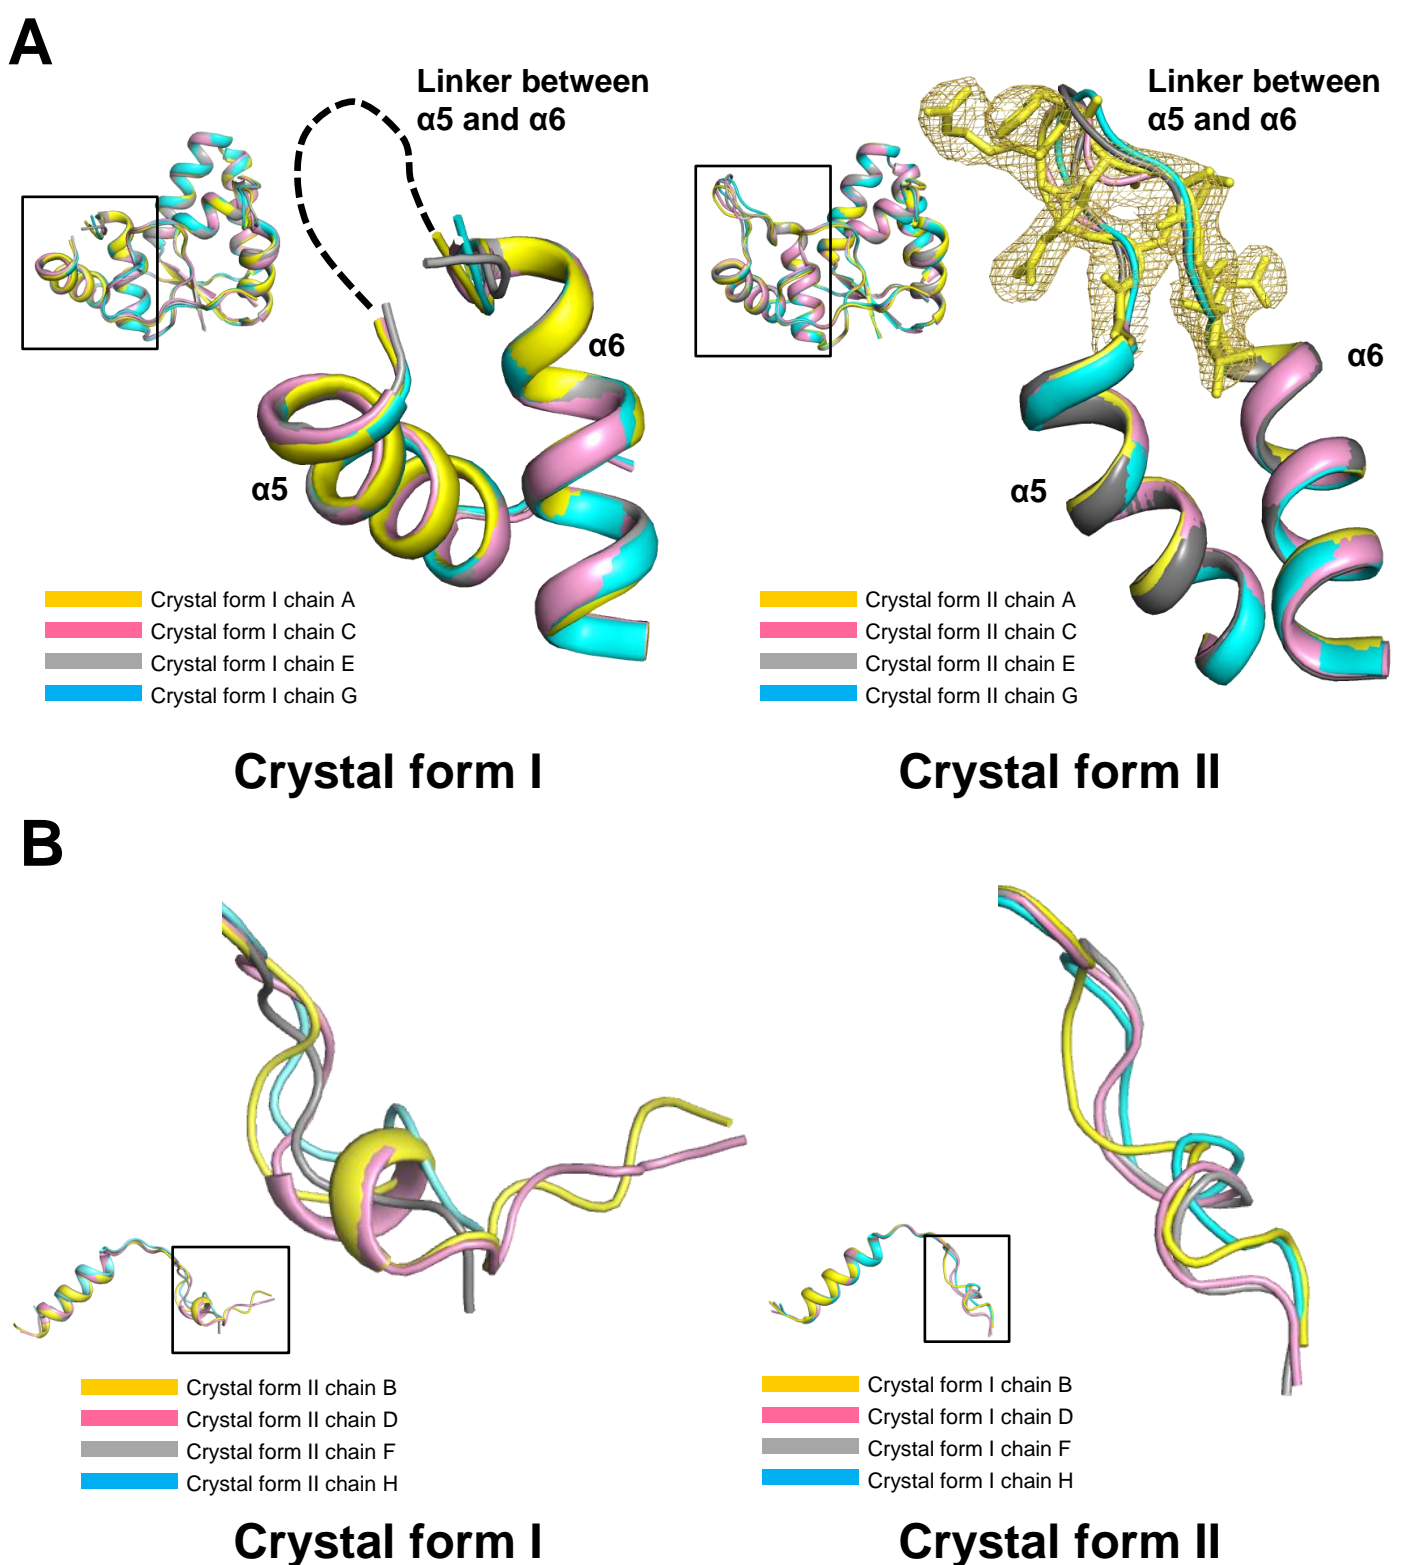

**Supplementary Figure S1.** Comparison of the different copies of the *M. tuberculosis* VapBC30 complex present in the asymmetric unit of crystal forms I and II. **(A)** Structural overlay of the four copies of VapC30 of crystal forms I (left) and II (right). Residues Gly89–Arg92 in the putative RNA binding loop are disordered in crystal form I, while the entire region is visible in crystal form II. Residues Gly87–Asn96 of crystal form II (chain A) are represented as stick models with its electron density map (*mFo-Fc*; contoured at  $1\sigma$ , colored yellow) **(B)** Structural overlay of the four copies of VapB30 of crystal forms I (left) and II (right). The slightly different orientations and secondary structure elements in the C-terminal region of VapB30 suggest that this region is dynamic.

**A**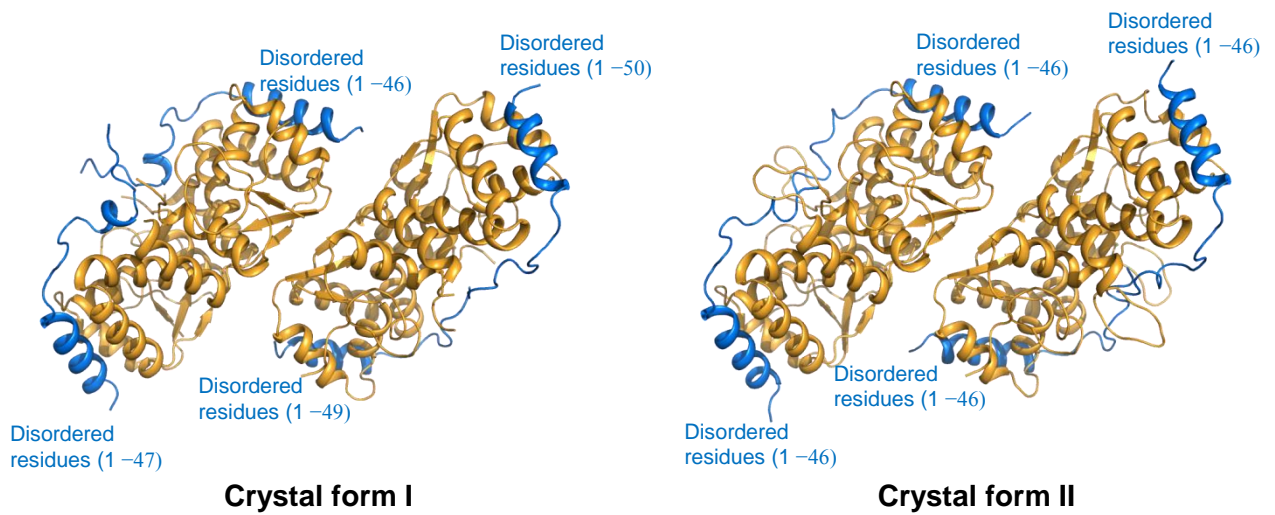**B**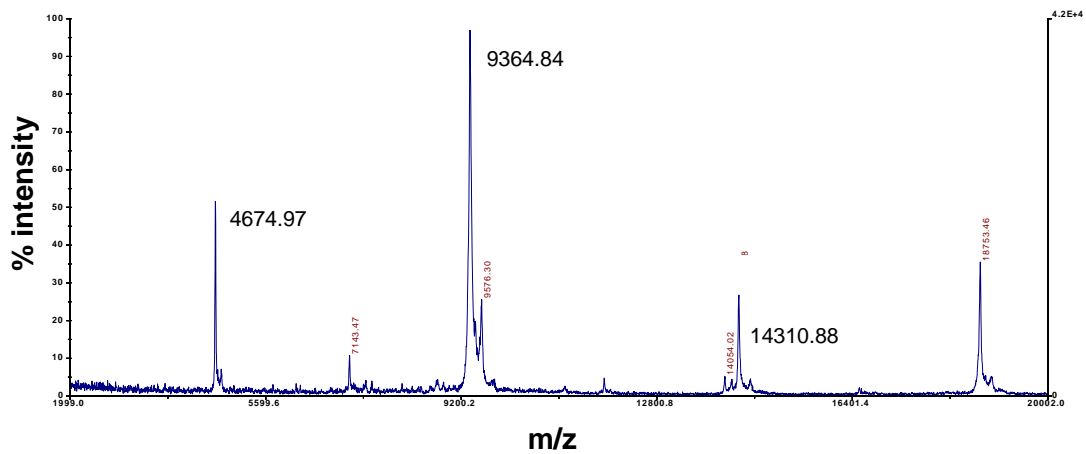**C**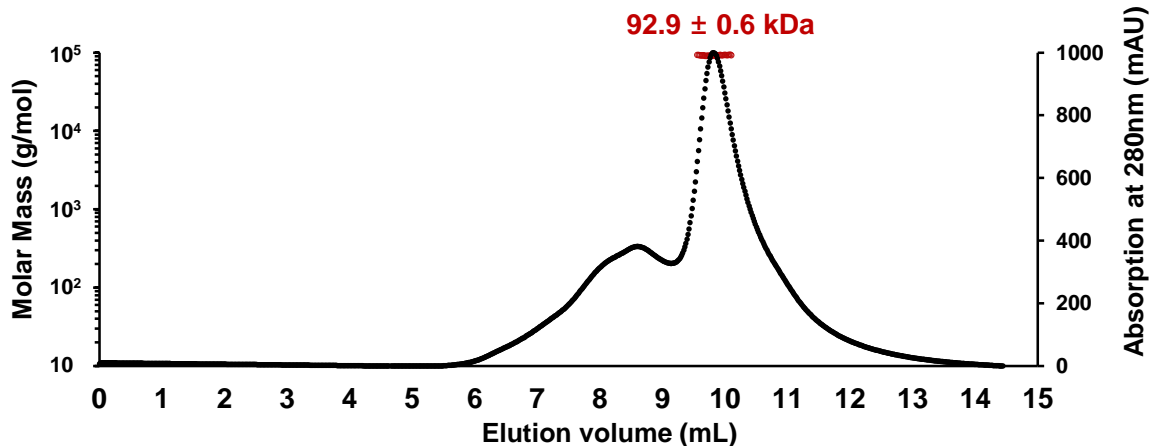

**Supplementary Figure S2.** *M. tuberculosis* VapBC30 exists as a heterooctamer in solution. (A) The crystallographic asymmetric unit of *M. tuberculosis* VapBC30 contains four copies of the VapBC30 complex in both crystal forms I (left) and II (right). *M. tuberculosis* VapC30 is shown in orange, and VapB30 is shown in blue. (B) MALDI-TOF spectrum of protein solution used for crystallization. (C) SEC-MALS chromatograms of the VapBC30 complex. The calculated molecular weight (left axis, red dotted line) and the UV absorption at 280nm (right axis, black dotted line) are plotted as a function of elution volume. Numbers above the peak indicate the average molecular weight obtained by MALS.

**A**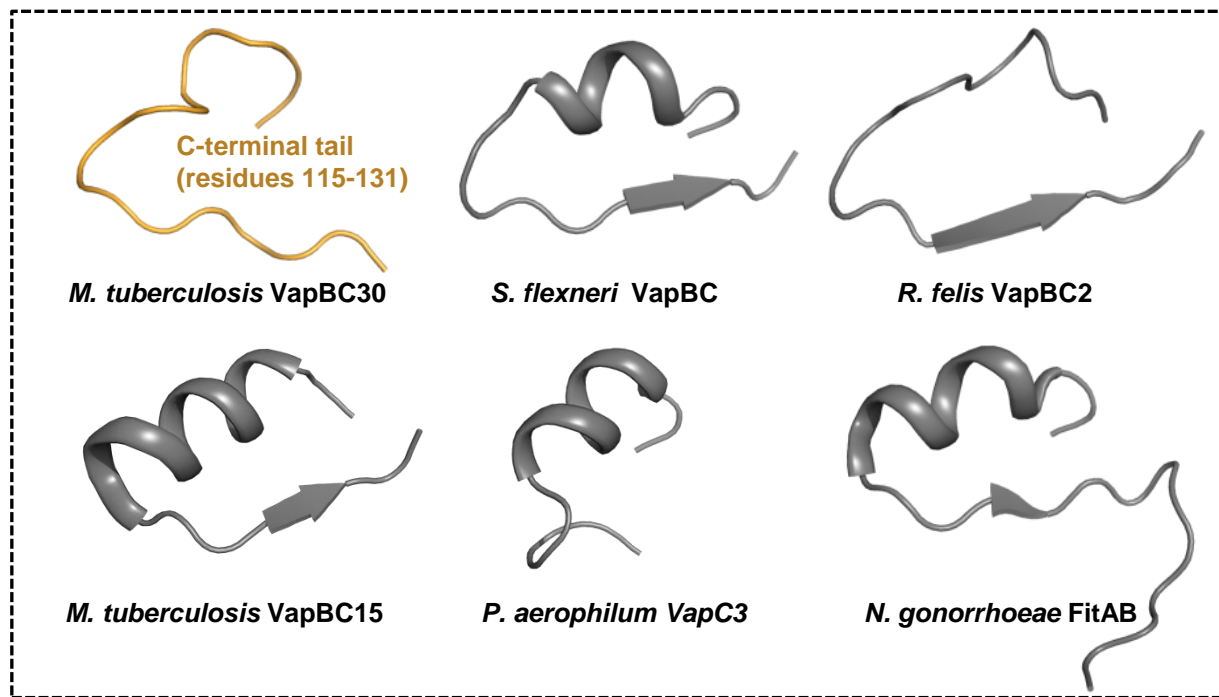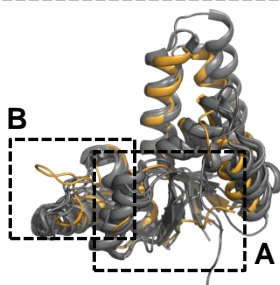**B**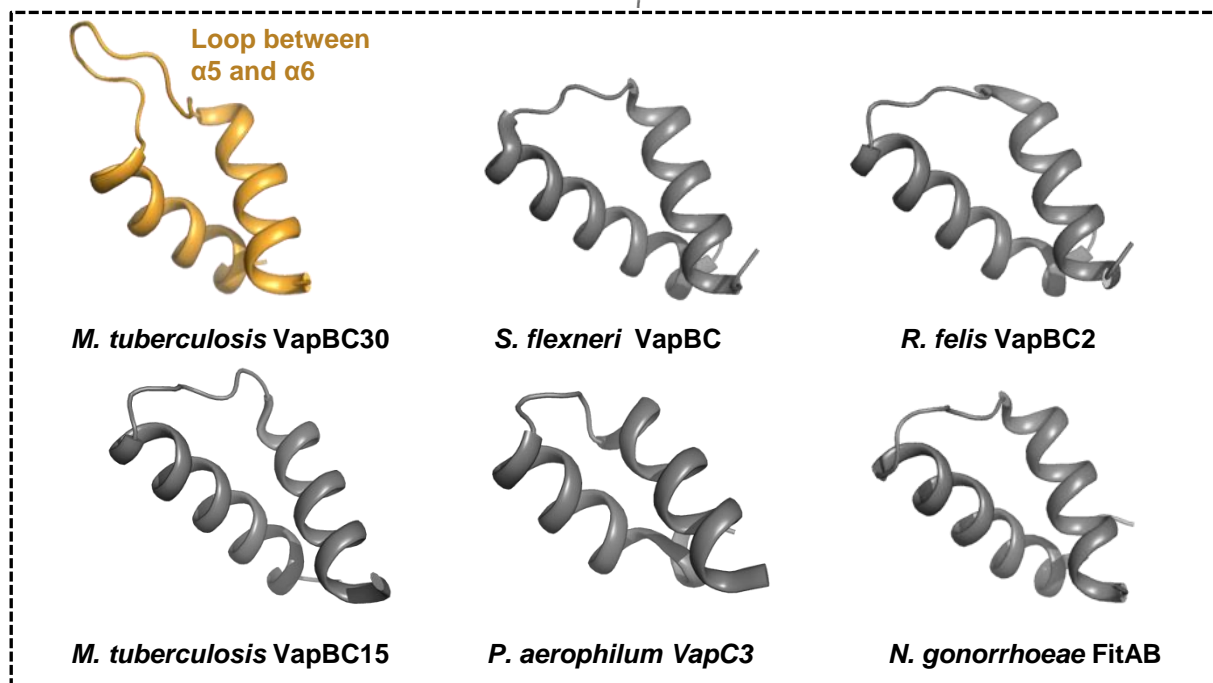

**Supplementary Figure S3.** Structural dissimilarities among *M. tuberculosis* VapC30 and PIN domain-containing proteins. **(A)** Comparisons of the C-terminal residues (residues 115–131) of *M. tuberculosis* VapC30 (orange) with PIN domain-containing proteins (grey). **(B)** Comparisons of the loop (residues 87–96) of *M. tuberculosis* VapC30 (orange) with other PIN domain-containing proteins (grey).

**A**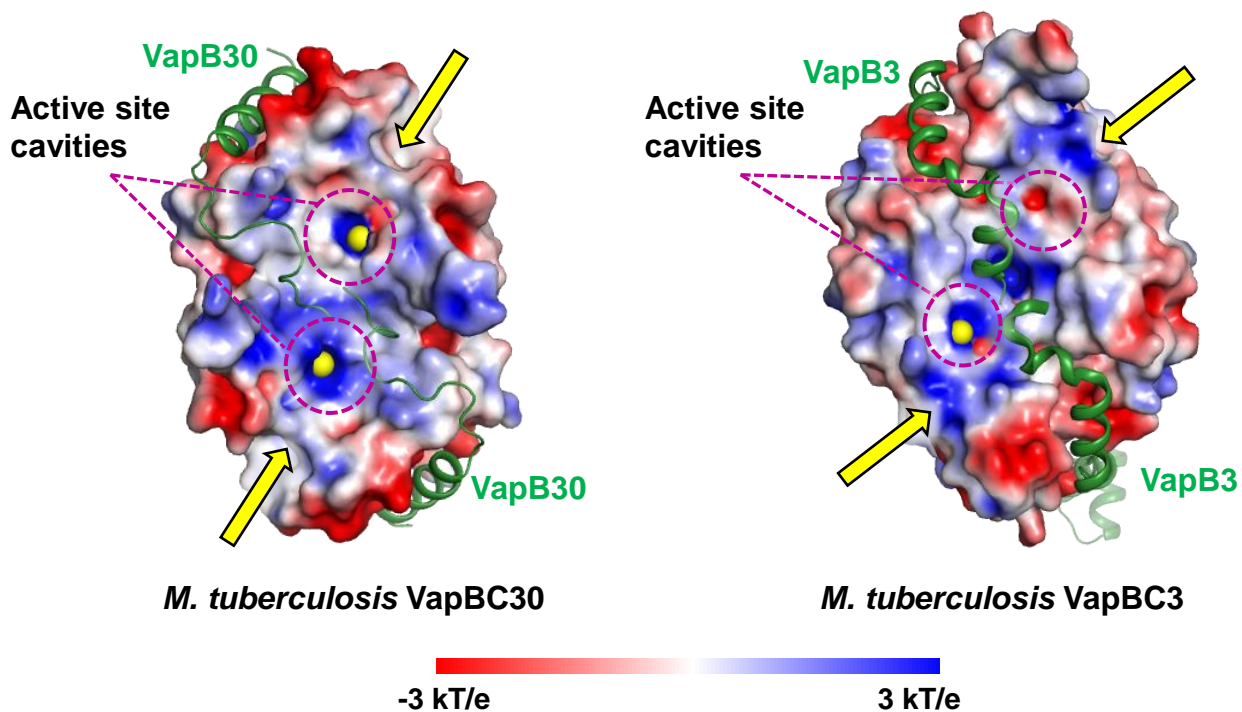**B**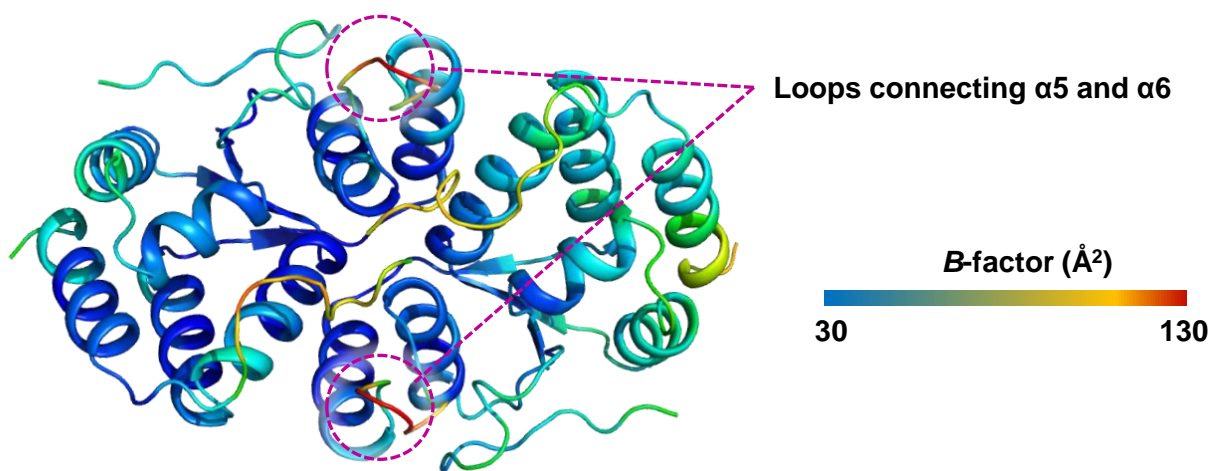

**Supplementary Figure S4.** Putative RNA binding loop of VapC30. **(A)** Electrostatic surface potentials of the *M. tuberculosis* VapC30 dimer of crystal form II (left) and *M. tuberculosis* VapBC3 (right), calculated with metal ions are plotted at  $\pm 3$  kT/e. The VapB30 antitoxin (left) and VapB3 antitoxin (right) are shown in cartoon representations (colored in green) and magnesium ions are shown in yellow spheres. The putative RNA binding groove and active site cavities are indicated by yellow arrows and pink dotted circles, respectively. **(B)** B-factor representation of *M. tuberculosis* VapC30 dimer. Note that the loops connecting  $\alpha 5$  and  $\alpha 6$  (pink dotted circles) have high B-factors, indicating a high degree of flexibility.

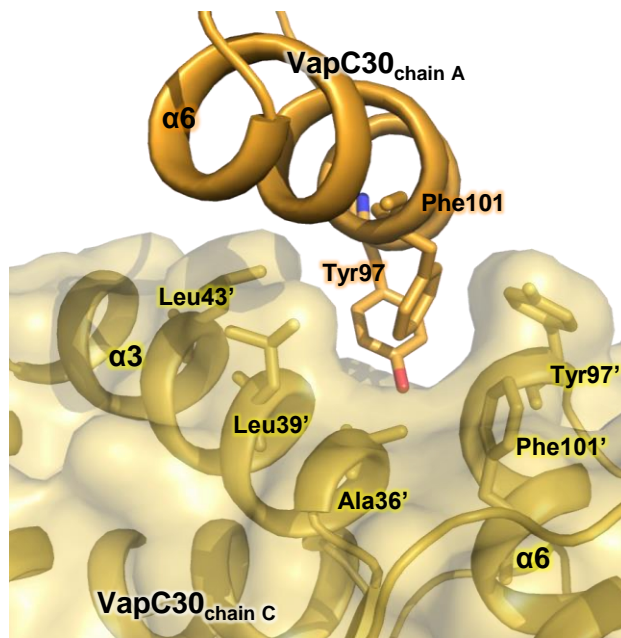

**Supplementary Figure S5.** Hydrophobic surface cavity formed by the hydrophobic residues Ala36, Leu39, Leu43, Tyr97, and Phe101 of VapC30 chain C. Chains A (orange) and C (yellow) are shown in cartoon representation, and chain C is shown with a partially transparent surface. For clarity, only the  $\alpha 6$  helix of chain A and the  $\alpha 3$ , 4, and 6 helices of chain C are shown. Residues participating in hydrophobic interactions are shown in stick models.

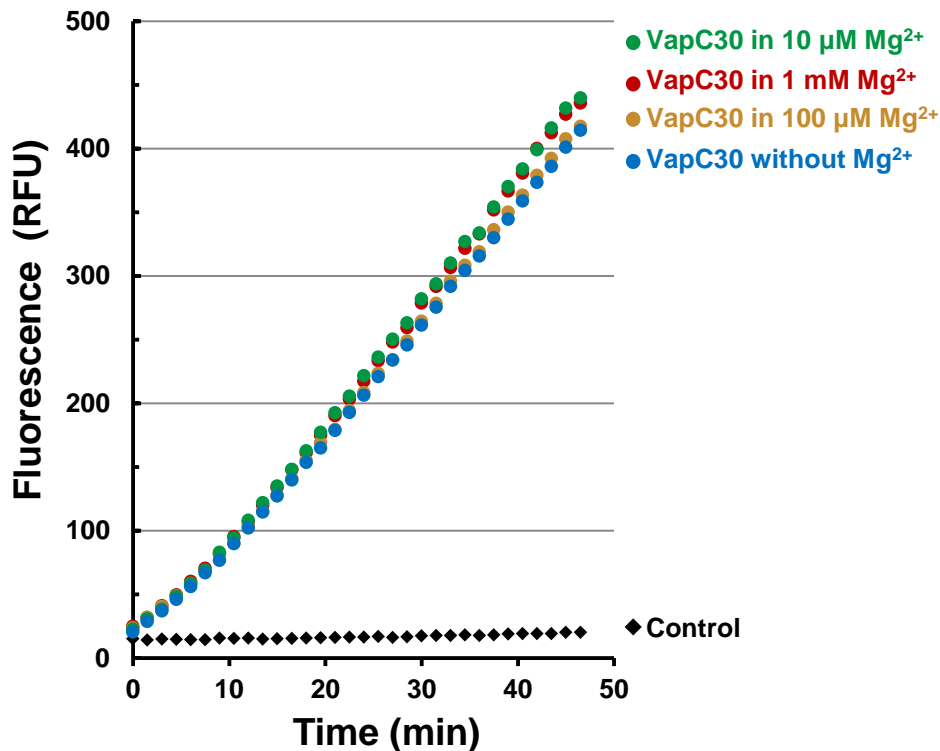

**Supplementary Figure S6.** Fluorescence quenching assays with 10  $\mu\text{M}$  VapC30 (EDTA untreated) with various concentrations of  $\text{Mg}^{2+}$  [0  $\mu\text{M}$  (blue), 10  $\mu\text{M}$  (green), 100  $\mu\text{M}$  (orange), and 1 mM (red)]. For the assay, 10  $\mu\text{M}$  VapC30, 0.5 M NaCl, 20 mM Tris-HCl buffer at pH 8.0, 40 units of RiboLock™ RNase inhibitor (Thermo Scientific), and  $\text{MgCl}_2$  were included in a 50  $\mu\text{l}$  reaction volume and incubated at 37°C. Control contained 1 mM  $\text{MgCl}_2$ , 0.5 M NaCl, 20 mM Tris-HCl buffer pH 8.0, and 40 units of RiboLock™ (Thermo scientific) RNase inhibitor. The assay clearly demonstrated the independence of VapC30 activity on  $\text{Mg}^{2+}$  ions, when EDTA was not treated before the assay.



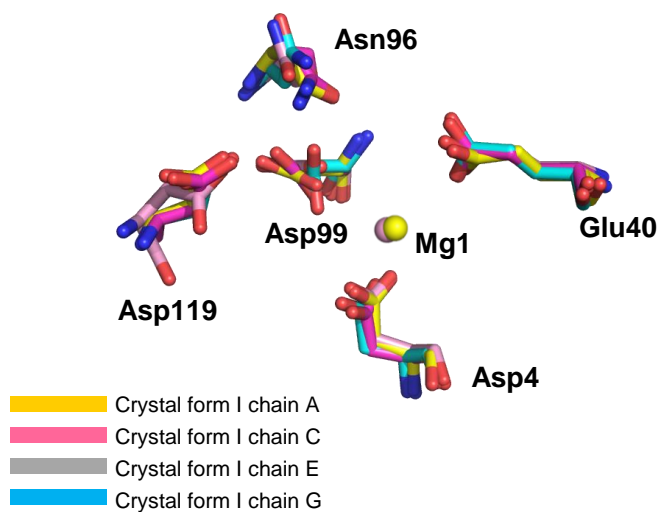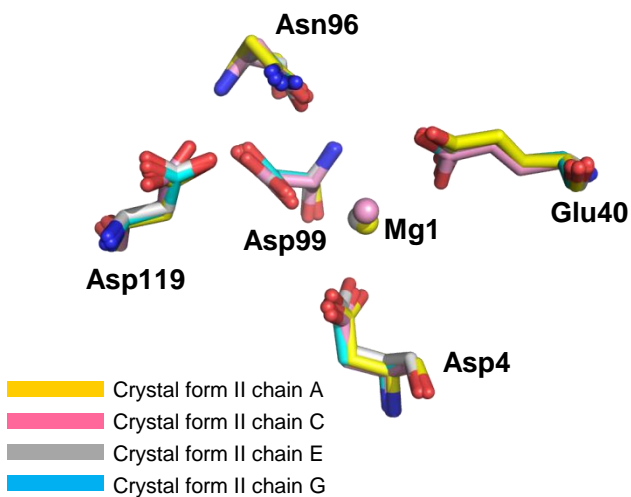

## Crystal form I

## Crystal form II

**Supplementary Figure S7.** Superimposition of the conserved acidic residues and Asn96 of VapC30 of crystal forms I (left) and II (right). Note the different orientations of Asn96 between chains of crystal form I. Magnesium ion (Mg1) is absent in chains E and G of crystal form I and chain G of crystal form II.

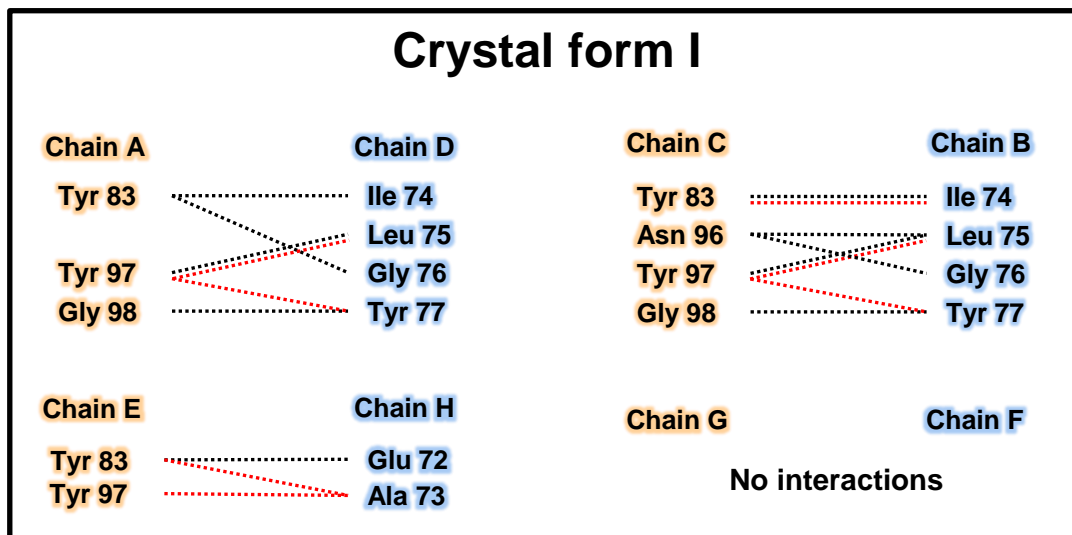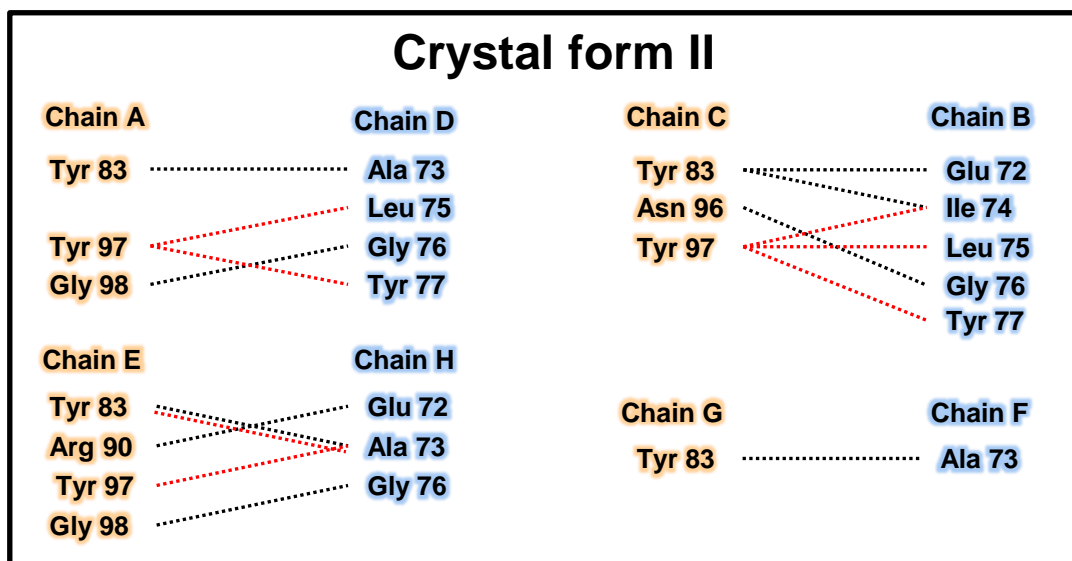

**Supplementary Figure S8.** Schematic diagrams of the hydrophilic interactions (black dotted lines) and hydrophobic interactions (red dotted lines) between residues of the C-terminal regions of VapB30 antitoxins and their distal VapC30 toxins. The interactions observed in crystal form I (upper) and crystal form II (lower) are shown separately.

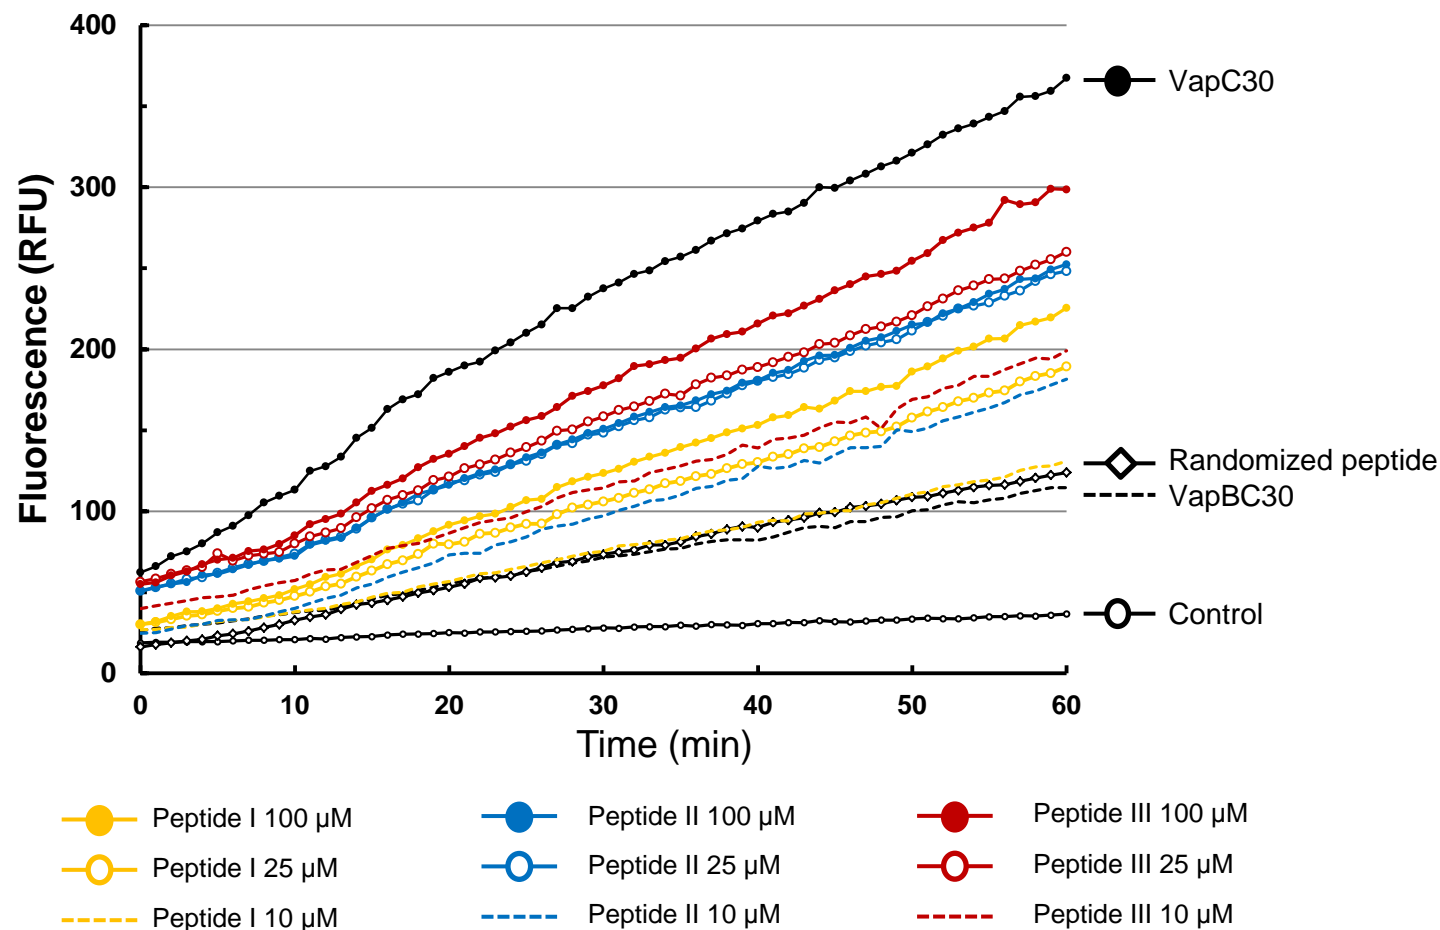

**Supplementary Figure S9.** Fluorescence time course experiments measuring disruption of VapBC30 complex (10  $\mu$ M) by designed peptides at increasing concentrations (10–100  $\mu$ M). The negative control contained 1 mM  $MgCl_2$ , 0.5 M NaCl, 20 mM Tris-HCl buffer pH 8.0, 40 units of RiboLock™ (Thermo scientific) RNase inhibitor, and 100  $\mu$ M of peptide I, II, and III. 100  $\mu$ M of 11-mer randomized peptide (Asp-Ser-Leu-Glu-Phe-Ile-Ala-Ser-Lys-Leu-Ala) was incubated with 10  $\mu$ M VapBC30 and used as control. Data shown is representative of three replicate experiments.
